# Supplementary material
Source: Springer Nature journal article supplement (https://www.springermedizin.de/resource/supplementary/12890_2012_366_MOESM3_ESM.pdf/9505056)

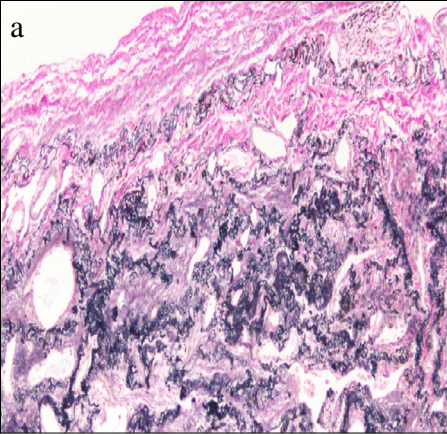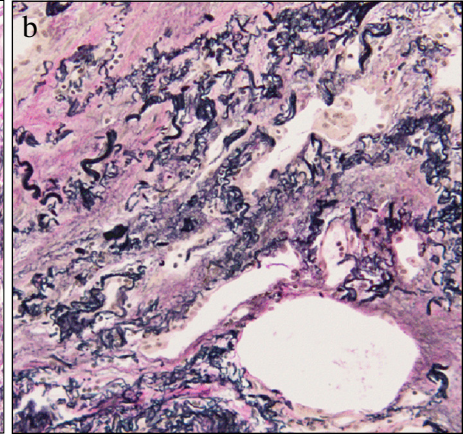

Supplement: MOESM3 [file 9505056]
